## Correction for: Catalpol enhanced physical exercise-mediated brain functional improvement in post-traumatic stress disorder model via promoting adult hippocampal neurogenesis

Lina Sun<sup>1,\*,&</sup>, Weiwei Zhang<sup>2,\*</sup>, Ruiqi Ye<sup>1</sup>, Lei Liu<sup>1</sup>, Lili Jiang<sup>1</sup>, Chao Xi<sup>3</sup>

<sup>1</sup>School of Physical Education, Beijing Normal University, Beijing, China

<sup>2</sup>Department of Anesthesiology, Shanxi Bethune Hospital, Taiyuan, China

<sup>3</sup>School of Life Science, Beijing Normal University, Beijing, China

\*Equal contribution

**Correspondence to:** Lina Sun, Chao Xi; **email:** [sunflm@126.com](mailto:sunflm@126.com), <https://orcid.org/0000-0003-2757-8761>; [xichao@bnu.edu.cn](mailto:xichao@bnu.edu.cn)

**Keywords:** catalpol, exercise, PTSD, hippocampal neurogenesis

**Original article:** *Aging (Albany NY)* 2021; 13: pp 18689—18700

PMID: [34326271](https://pubmed.ncbi.nlm.nih.gov/34326271/)

PMCID: [PMC8351689](https://pubmed.ncbi.nlm.nih.gov/PMC8351689/)

DOI: [10.18632/aging.203313](https://doi.org/10.18632/aging.203313)

**This article has been corrected:** The authors found that the data used for statistical analysis of BrdU-positive cells in the DG region presented as a bar graph in **Figure 5C** is an accidental duplication of the bar graph in **Figure 5G**, which presents data used for statistical analysis of BrdU-positive cells in the DG region in a different experiment. The authors replaced the bar graph in **Figure 5C** with the correct data from the original corresponding experiment. This correction does not affect the article's conclusions.

Corrected **Figure 5** is presented below.

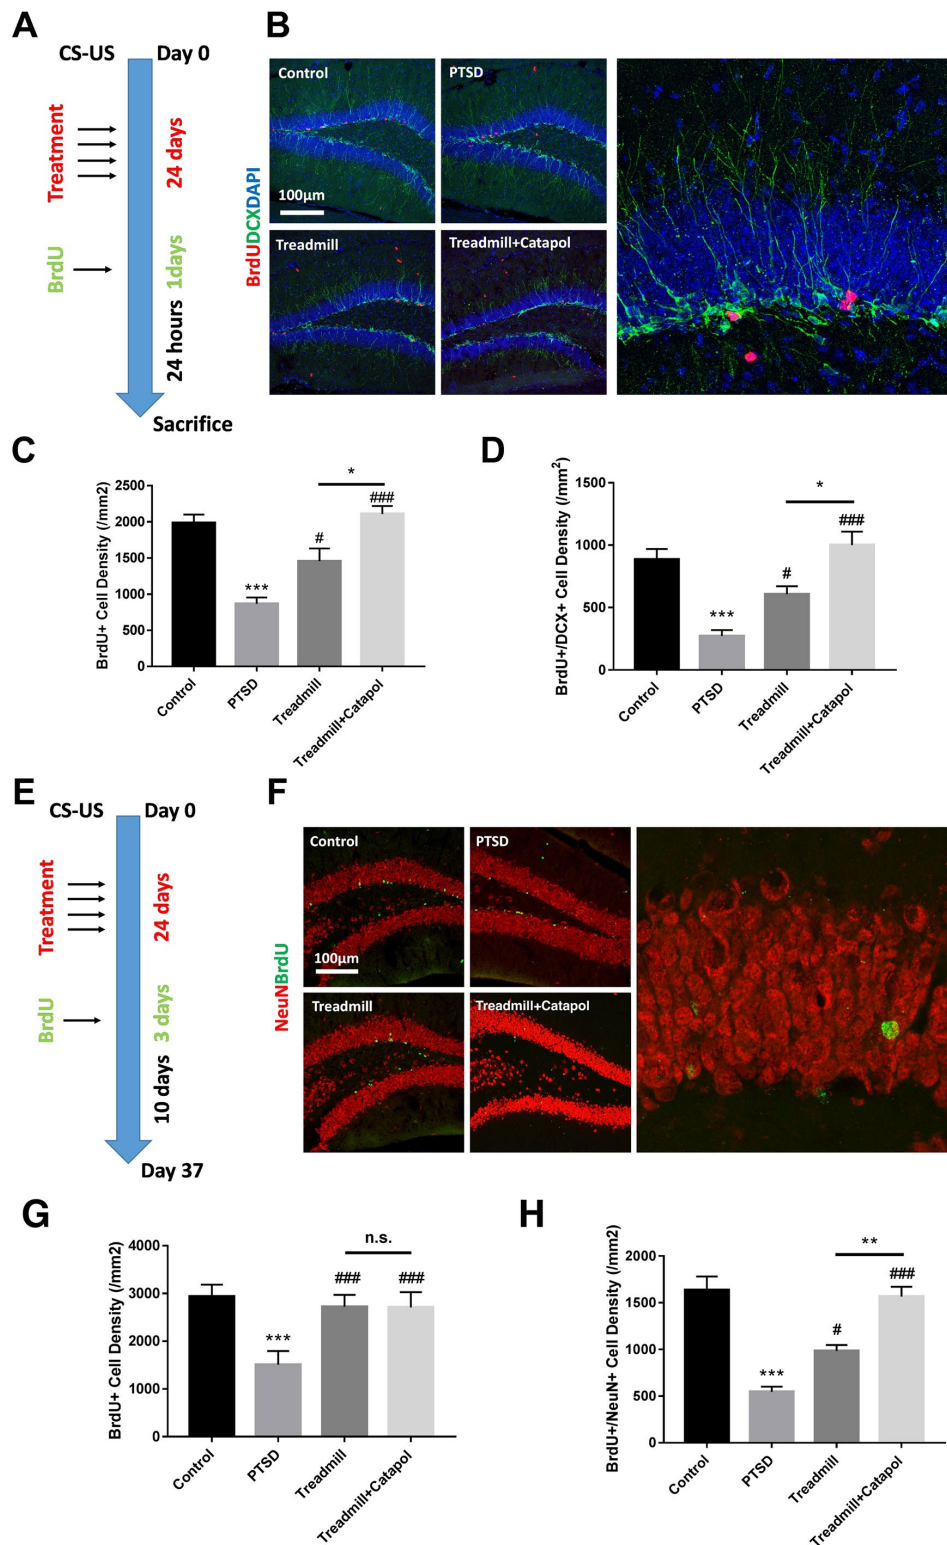

**Figure 5. Catalpol promoted neural differentiation without changing the survival of the immature neurons.** (A, E) experimental procedure of different BrdU injection protocol. (B) DCX staining (green) coupled with BrdU (red) in DG to assess the NSCs neural differentiation. (C, D) Statistical analysis of the BrdU positive cell and BrdU/DCX dual positive cells in DG region. (F) NeuN staining (red) coupled with BrdU (green) in DG to assess the neural maturation in DG. (G, H) Statistical analysis of the BrdU positive cell and BrdU/NeuN dual positive cells in DG region. One-way ANOVA, \*\*\* $p < 0.001$  vs. control; # $p < 0.05$ , ### $p < 0.001$ .
